# Supplementary material for: RF_Purify: a novel tool for comprehensive analysis of tumor-purity in methylation array data based on random forest regression
Source: Springer Nature journal article supplement (doi:10.1186/s12859-019-3014-z), 2019-08-16

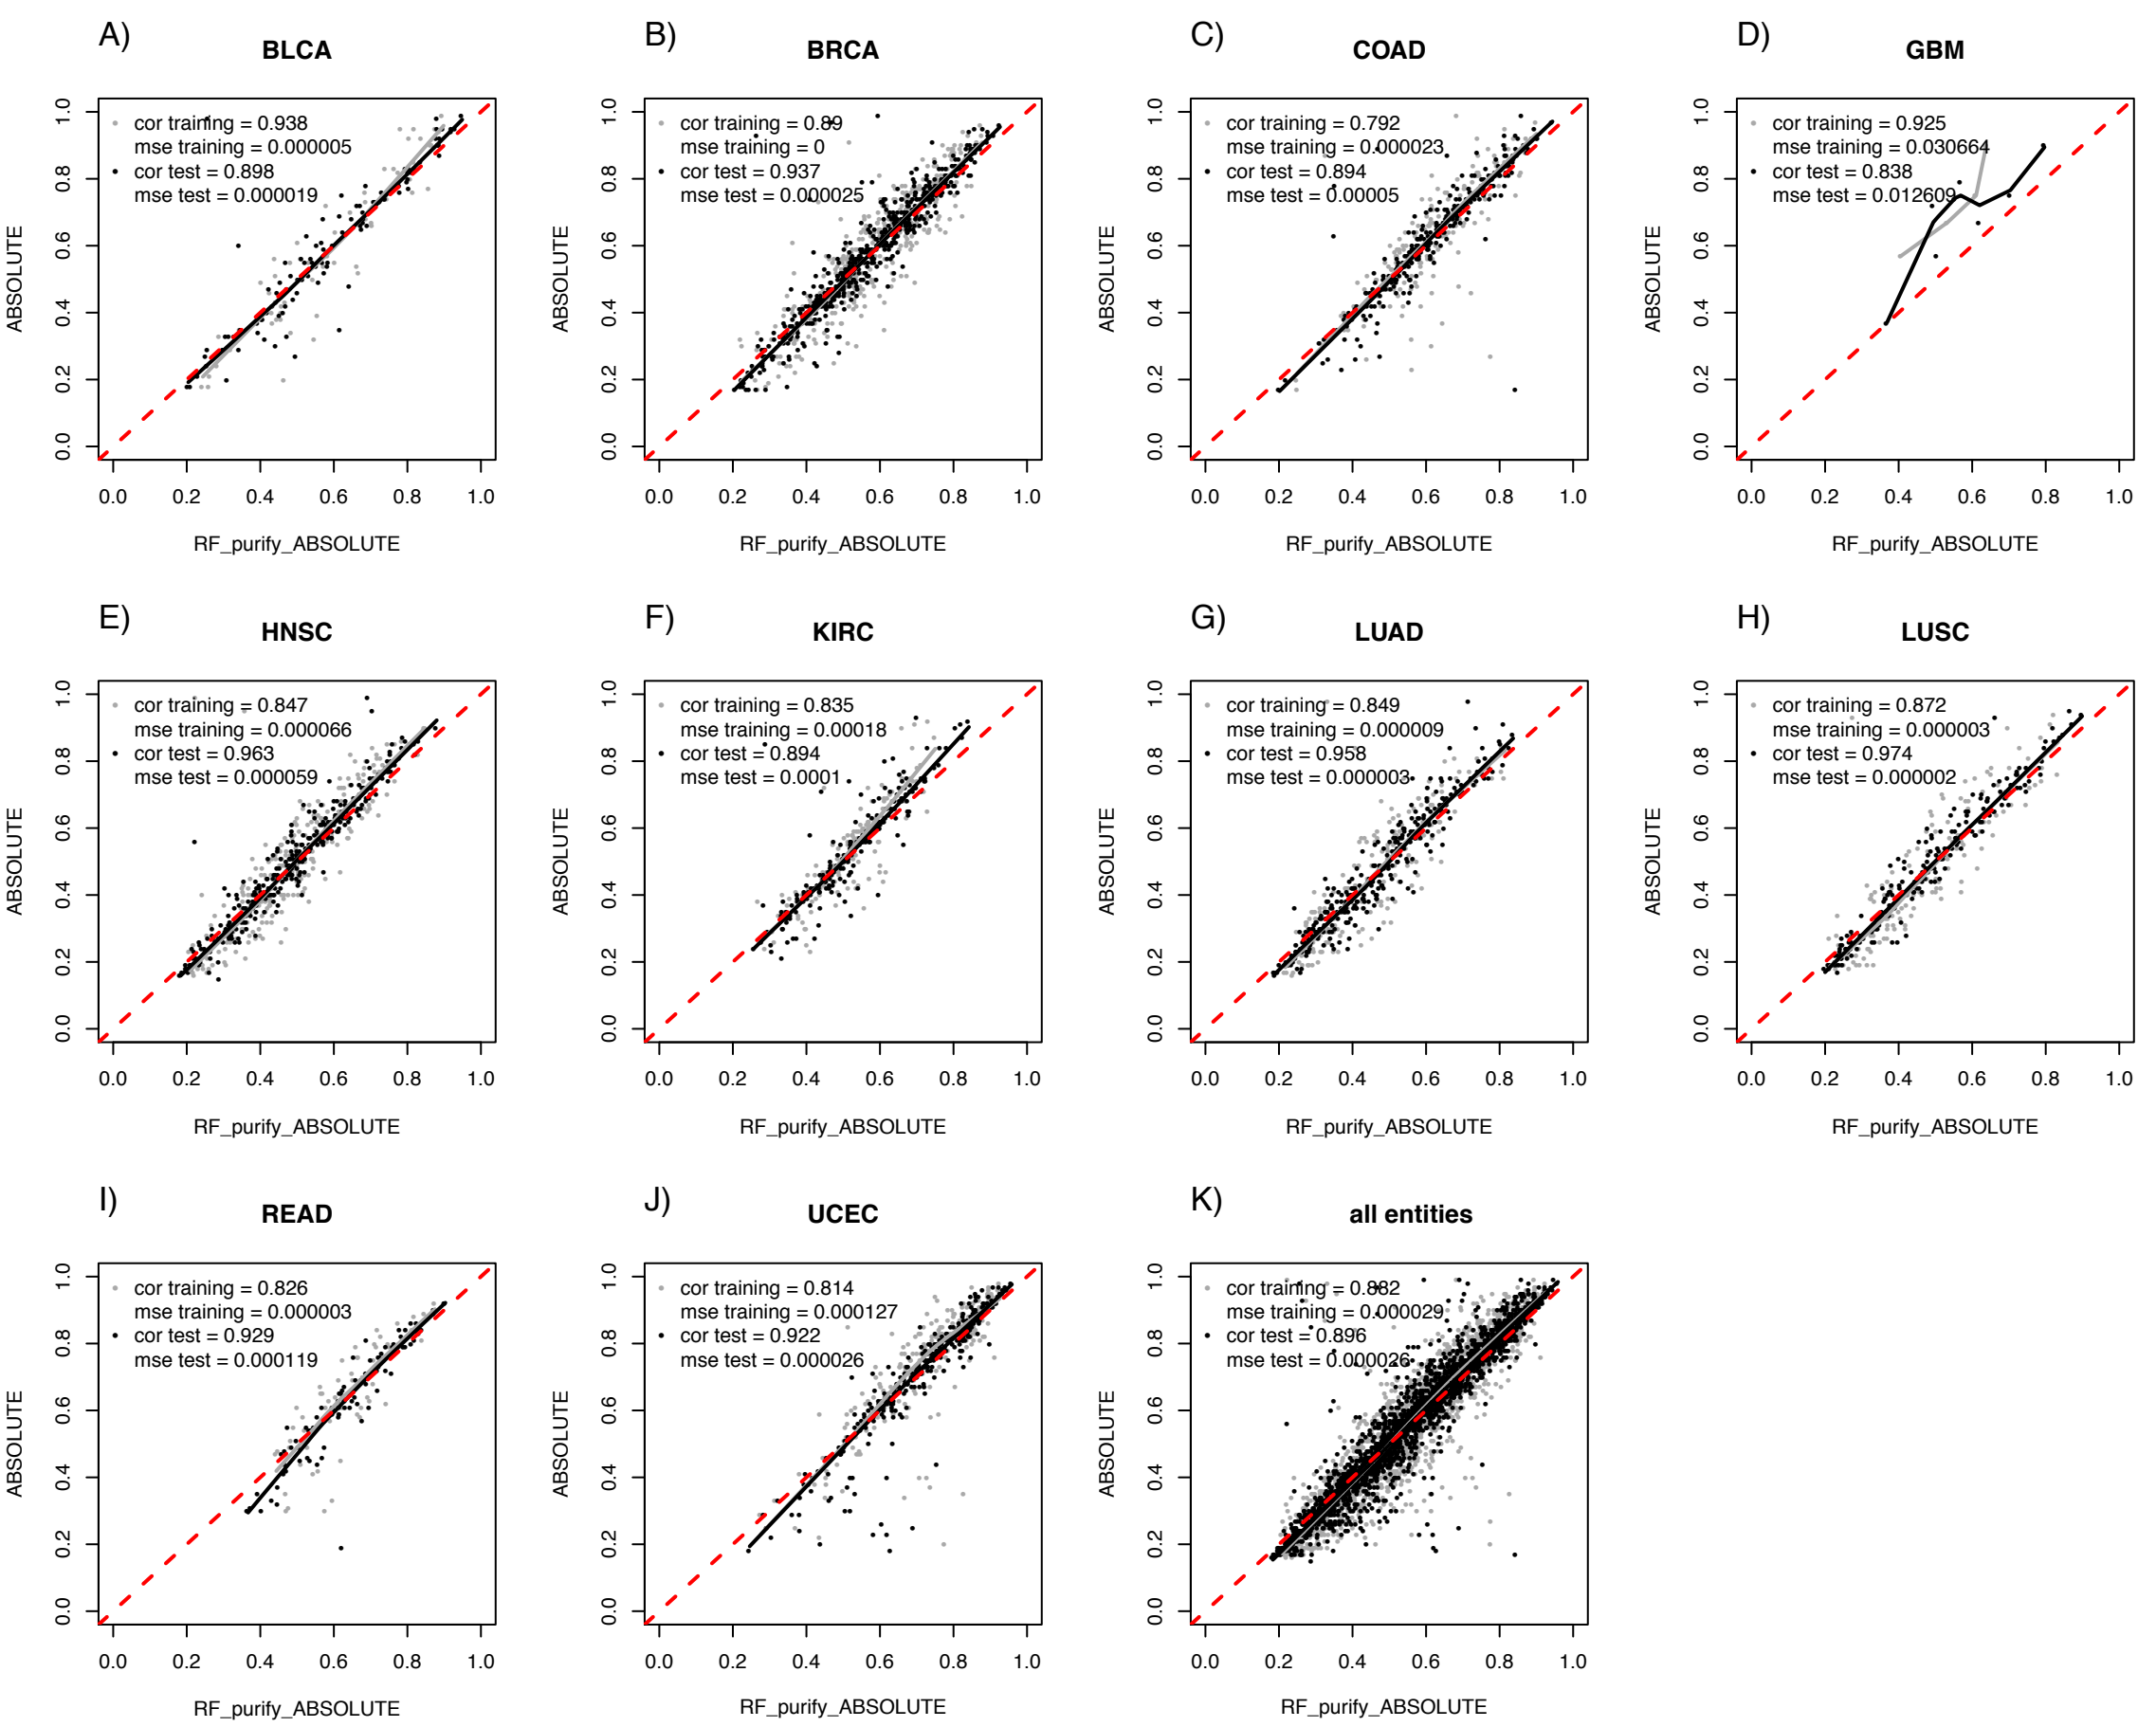

Supplement: 12859_2019_3014_MOESM1_ESM.pdf [file 12859_2019_3014_MOESM1_ESM.pdf]
