# Supplementary material for: RF_Purify: a novel tool for comprehensive analysis of tumor-purity in methylation array data based on random forest regression
Source: Springer Nature journal article supplement (doi:10.1186/s12859-019-3014-z), 2019-08-16
Supplement: 12859_2019_3014_MOESM2_ESM.pdf [file 12859_2019_3014_MOESM2_ESM.pdf]

TCGA dataset with available ESTIMATE purities (6343 samples)

Split of the whole dataset in training (4452 samples) and test (1891 samples) set

Hartigan's Dip Test and determination of the 5%, 10%, 20%, and 30% most variable sites

1. random forest step (500 trees, selection of the top 0.1%, 1%, 5% and 10% CpG sites)

2. random forest step (finalization of the model), no variable reduction

Selection of the model with the lowest MSE of RF\_purify\_ESTIMATE and ESTIMATE values in the test set

Cross validation in an independent dataset (Capper et al. 2018): Generation of ESTIMATE values and comparison to RF\_purify+ESTIMATE

TCGA dataset with available ABSOLUTE purities (2308 samples)

Split of the whole dataset in training (1617 samples) and test (691 samples) set

Hartigan's Dip Test and determination of the 5%, 10%, 20%, and 30% most variable sites

1. random forest step (500 trees, selection of the top 0.1%, 1%, 5% and 10% CpG sites)

2. random forest step (finalization of the model), no variable reduction

Selection of the model with the lowest MSE of RF\_purify\_ABSOLUTE and ABSOLUTE values in the test set

Split of dataset and dip test

Model generation

Validation in an independent dataset
