# Supplementary material for: RF_Purify: a novel tool for comprehensive analysis of tumor-purity in methylation array data based on random forest regression
Source: BMC Bioinformatics. 2019 Aug 16;20:428. doi: 10.1186/s12859-019-3014-z (PMC6697926; doi:10.1186/s12859-019-3014-z)
Supplement: Supplementary file 7 — Table S3. Abbreviations for the entities represented in the TCGA dataset and in Capper et al. (XLSX 13 kb) [file 12859_2019_3014_MOESM7_ESM.xlsx]

## Sheet: TCGA
Abbreviations_TCGA_datasets
ACC	Adrencortical carcinoma
BLCA	Bladder urothelial carcinoma
BRCA	Breast invasvie carcinoma
CESC	Cervical squamous cell carcinoma and endocervical adenocarcinoma
COAD	Colon adenocarcinoma
HNSC	Head and neck squamous cell carcinoma
KICH	Kidney Chromophobe
KIRC	Kidney renal cell carcinoma
KIRP	Kidney renal papillary cell carcinoma
LUAD	Lung adenocarcinoma
LUSC	Lung squamous cell carcinoma
PRAD	Pancreatic adenocarcinoma
READ	Rectum adenocarcinoma
SKCM	Skin Cutaneous Melanoma
UCEC	Uterine Corpus Endometrial Carcinoma

## Sheet: Capper_et_al
Abbreviations_Capper_et_al
Methylation Class Name	Methylation Class Name Abbreviated
methylation class embryonal tumor with multilayered rosettes	ETMR
methylation class medulloblastoma, WNT	MB, WNT
methylation class diffuse midline glioma H3 K27M mutant	DMG, K27
methylation class central neurocytoma	CN
methylation class diffuse leptomeningeal glioneuronal tumor	DLGNT
methylation class cerebellar liponeurocytoma	LIPN
methylation class low grade glioma, desmoplastic infantile astrocytoma / ganglioglioma	LGG, DIG/DIA
methylation class low grade glioma, dysembryoplastic neuroepithelial tumor	LGG, DNT
methylation class low grade glioma, rosette forming glioneuronal tumor	LGG, RGNT
methylation class retinoblastoma	RETB
methylation class schwannoma	SCHW
methylation class melanotic schwannoma	SCHW, MEL
methylation class craniopharyngioma, adamantinomatous	CPH, ADM
methylation class craniopharyngioma, papillary	CPH, PAP
methylation class pituitary adenoma, ACTH	PITAD, ACTH
methylation class pituitary adenoma, FSH/LH	PITAD, FSH LH
methylation class pituitary adenoma, prolactin	PITAD, PRL
methylation class pituitary adenoma, STH sparsely granulated	PITAD, STH SPA
methylation class pituitary adenoma, TSH	PITAD, TSH
methylation class ependymoma, RELA fusion	EPN, RELA
methylation class chordoid glioma of the third ventricle	CHGL
methylation class low grade glioma, subependymal giant cell astrocytoma	LGG, SEGA
methylation class chordoma	CHORDM
methylation class Ewing sarcoma	EWS
methylation class hemangioblastoma	HMB
methylation class melanoma	MELAN
methylation class melanocytoma	MELCYT
methylation class lymphoma	LYMPHO
methylation class plasmacytoma	PLASMA
methylation class medulloblastoma, subclass group 3	MB, G3
methylation class medulloblastoma, subclass group 4	MB, G4
methylation class medulloblastoma, subclass SHH A (children and adult)	MB, SHH CHL AD
methylation class medulloblastoma, subclass SHH B (infant)	MB, SHH INF
methylation class atypical teratoid/rhabdoid tumor, subclass MYC	ATRT, MYC
methylation class atypical teratoid/rhabdoid tumor, subclass SHH	ATRT, SHH
methylation class atypical teratoid/rhabdoid tumor, subclass TYR	ATRT, TYR
methylation class glioblastoma, IDH wildtype, H3.3 G34 mutant	GBM, G34
methylation class glioblastoma, IDH wildtype, subclass mesenchymal	GBM, MES
methylation class glioblastoma, IDH wildtype, subclass midline	GBM, MID
methylation class glioblastoma, IDH wildtype, subclass MYCN	GBM, MYCN
methylation class glioblastoma, IDH wildtype, subclass RTK I	GBM, RTK I
methylation class glioblastoma, IDH wildtype, subclass RTK II	GBM, RTK II
methylation class glioblastoma, IDH wildtype, subclass RTK III	GBM, RTK III
methylation class esthesioneuroblastoma, subclass A	ENB, A
methylation class esthesioneuroblastoma, subclass B	ENB, B
methylation class paraganglioma, spinal non-CIMP	PGG, nC
methylation class pituitary adenoma, STH densely granulated, group A	PITAD, STH DNS A
methylation class pituitary adenoma, STH densely granulated, group B	PITAD, STH DNS B
methylation class low grade glioma, subclass posterior fossa pilocytic astrocytoma	LGG, PA PF
methylation class low grade glioma, subclass midline pilocytic astrocytoma	LGG, PA MID
methylation class papillary tumor of the pineal region group A	PTPR, A
methylation class papillary tumor of the pineal region group B	PTPR, B
methylation class pineoblastoma group B	PIN T, PB B
methylation class ependymoma, posterior fossa group A	EPN, PF A
methylation class ependymoma, posterior fossa group B	EPN, PF B
methylation class ependymoma, spinal	EPN, SPINE
methylation class ependymoma, YAP fusion	EPN, YAP
methylation class CNS neuroblastoma with FOXR2 activation	CNS NB, FOXR2
methylation class solitary fibrous tumor / hemangiopericytoma	SFT HMPC
methylation class plexus tumor, subclass adult	PLEX, AD
methylation class plexus tumor, subclass paediatric A	PLEX, PED A
methylation class plexus tumor, subclass paediatric B	PLEX, PED B
methylation class IDH glioma, subclass astrocytoma	A IDH
methylation class IDH glioma, subclass high grade astrocytoma	A IDH, HG
methylation class IDH glioma, subclass 1p/19q codeleted oligodendroglioma	O IDH
methylation class pineal parenchymal tumor	PIN T, PPT
methylation class low grade glioma, ganglioglioma	LGG, GG
methylation class pituicytoma / granular cell tumor / spindle cell oncocytoma	PITUI, SCO, GCT
methylation class low grade glioma, subclass hemispheric pilocytic astrocytoma and ganglioglioma	LGG, PA/GG ST
methylation class (anaplastic) pleomorphic xanthoastrocytoma	PXA
methylation class meningioma	MNG
methylation class ependymoma, myxopapillary	EPN, MPE
methylation class subependymoma, posterior fossa	SUBEPN, PF
methylation class subependymoma, spinal	SUBEPN, SPINE
methylation class subependymoma, supratentorial	SUBEPN, ST
methylation class pineoblastoma group A / intracranial retinoblastoma	PIN T, PB A
methylation class low grade glioma, MYB/MYBL1	LGG, MYB
methylation class CNS high grade neuroepithelial tumor with BCOR alteration	HGNET, BCOR
methylation class anaplastic pilocytic astrocytoma	ANA PA
methylation class CNS high grade neuroepithelial tumor with MN1 alteration	HGNET, MN1
methylation class infantile hemispheric glioma	IHG
methylation class CNS Ewing sarcoma family tumor with CIC alteration	EFT, CIC
